# Supplementary material for: Microfluidic Cell Retention Device for Perfusion of Mammalian Suspension Culture
Source: PubMed Central journal article supplement (PMC5532224; doi:10.1038/s41598-017-06949-8), 2017-07-27
Supplement: 41598_2017_6949_MOESM2_ESM.pdf [file 41598_2017_6949_MOESM2_ESM.pdf]

1 **Supplementary Information**

2

3 **Microfluidic Cell Retention Device for Perfusion of**

4 **Mammalian Suspension Culture**

5

6

7 Taehong Kwon<sup>1</sup>, Holly Prentice<sup>2</sup>, Jonas De Oliveira<sup>3</sup>, Nyasha Madziva<sup>3</sup>, Majid Ebrahimi

8 Warkiani<sup>4</sup>, Jean-François. P. Hamel<sup>3\*\*</sup>, and Jongyoon Han<sup>1, 5, 6\*</sup>

9

10

11

12 *<sup>1</sup>Department of Electrical Engineering and Computer Science, Massachusetts Institute of*

13 *Technology, USA*

14 *<sup>2</sup>H Prentice Consulting LLC, USA*

15 *<sup>3</sup>Department of Chemical Engineering, Massachusetts Institute of Technology, USA*

16 *<sup>4</sup>School of Mechanical and Manufacturing Engineering, University of New South Wales,*

17 *Australia*

18 *<sup>5</sup>BioSystems and Micromechanics (BioSyM) IRG, Singapore-MIT Alliance for Research and*

19 *Technology (SMART) Centre, Singapore*

20 *<sup>6</sup>Department of Biological Engineering, Massachusetts Institute of Technology, USA*

21

22

23 *\*Correspondence should be addressed to Jongyoon Han ([jyhan@mit.edu](mailto:jyhan@mit.edu))*

24 *Phone : +1-617-253-2290, Fax : +1-617-258-5846*

25

26 *\*\*Co-correspondence should be addressed to Jean-François. P. Hamel ([jhamel@mit.edu](mailto:jhamel@mit.edu))*

27 *Phone : +1-617-258-6665, Fax : +1-253-9894*

28

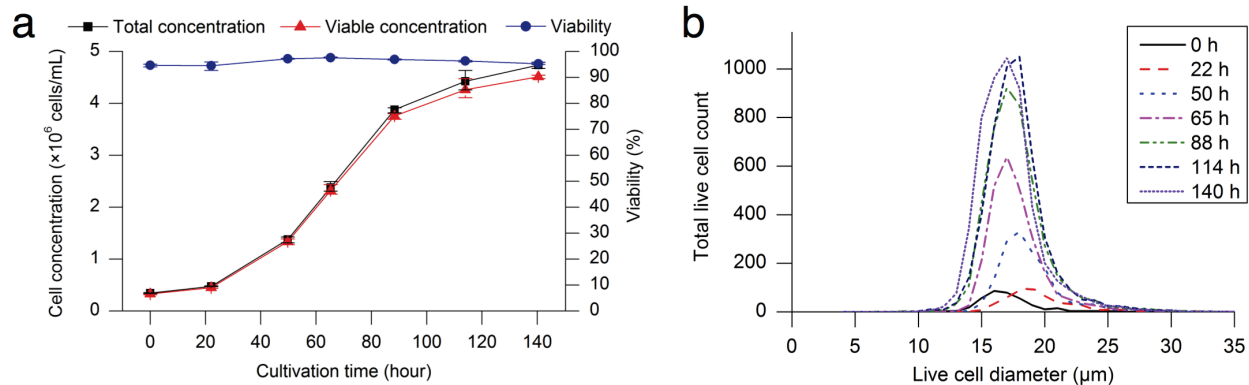

29  
 30 **Supplementary Figure S1** Batch culture and distribution of diameters of live CHO cells. **(a)**  
 31 CHO cells were cultivated in a spinner flask on batch mode for 140 h. Concentration and  
 32 viability were analyzed daily using automated equipment (Bioprofile CDV Analyzer, Nova  
 33 Biomedical, USA). The total cell concentration reached approximately 4.7 million cells/mL, and  
 34 the viability was 95% at 140 h. Error bars, data range ( $n = 3$ , technical replicates). **(b)** Diameters  
 35 of live CHO cells were measured using the same equipment. The cells had an average diameter  
 36 of 17.8  $\mu\text{m}$  during growth phase (*e.g.*, 65 h).

37

| Cultivation time (h) | Number of live cell cells analyzed | Average live cell diameter ( $\mu\text{m}$ ) | Standard deviation of live cell diameters ( $\mu\text{m}$ ) |
|----------------------|------------------------------------|----------------------------------------------|-------------------------------------------------------------|
| 0                    | 380                                | 17.2                                         | 2.7                                                         |
| 22                   | 502                                | 19.7                                         | 3.1                                                         |
| 50                   | 1,458                              | 18.7                                         | 2.5                                                         |
| 65                   | 2,617                              | 17.8                                         | 2.4                                                         |
| 88                   | 4,370                              | 17.7                                         | 2.5                                                         |
| 114                  | 4,811                              | 17.8                                         | 2.4                                                         |
| 140                  | 5,208                              | 17.1                                         | 2.4                                                         |
| <b>Total</b>         | <b>19,346</b>                      | <b>17.7</b>                                  | <b>2.5</b>                                                  |

38

39 **Supplementary Table S1** Summary of data in **Supplementary Figure S1b**.

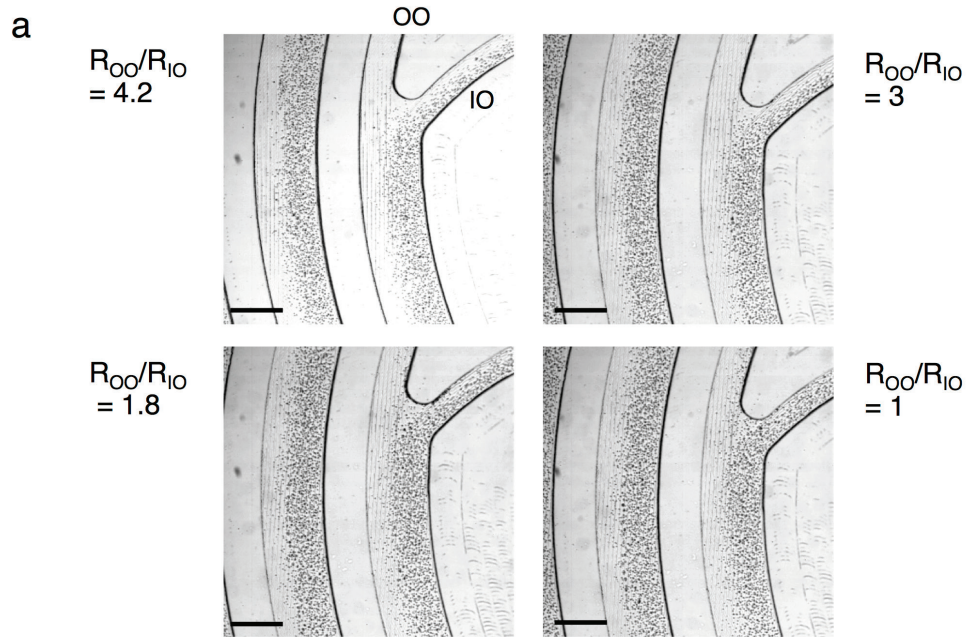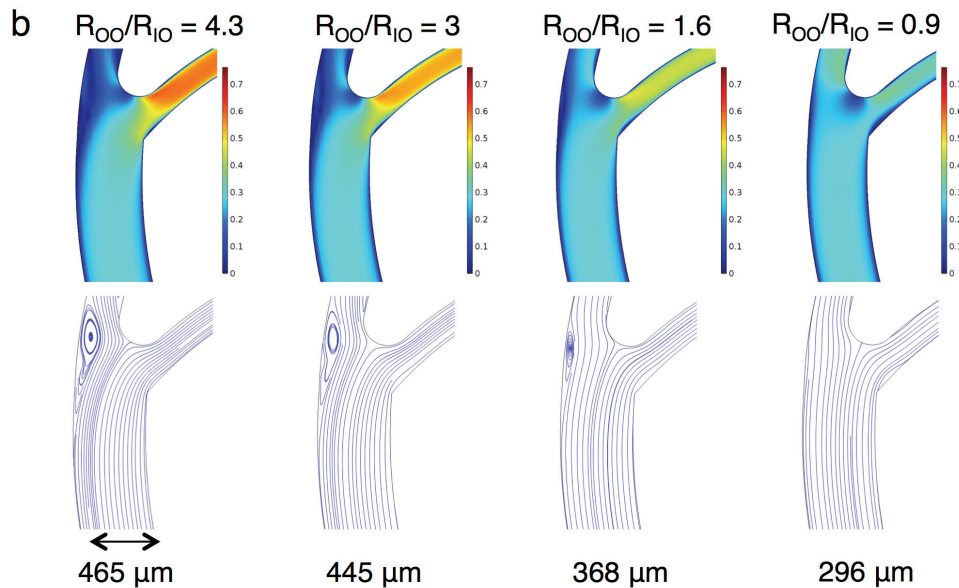

40  
 41 **Supplementary Figure S2** The CHO cells at the bifurcation of the microfluidic cell retention  
 42 device at different fluidic resistance ratios of the outlets (**a**) The CHO cells (11 million cells/mL,  
 43 97% viability) near the outlets of the microfluidic cell retention device ( $R_{OO}$ , fluidic resistance of  
 44 the outer outlet;  $R_{IO}$ , fluidic resistance of the inner outlet). The input flow rate was 1 mL/min.  
 45 Higher cell retention was visually confirmed for higher fluidic resistance ratio ( $R_{OO}/R_{IO}$ ). Scale  
 46 bars, 500  $\mu\text{m}$ . The distinct clear region in the inner outlet was identified at the first and second  
 47 highest fluidic resistance ratios ( $R_{OO}/R_{IO} = 4.2$  and  $R_{OO}/R_{IO} = 3$ ). This region indicates the  
 48 enlarged streamline boundary at the bifurcation under higher fluidic resistance ratios ( $R_{OO}/R_{IO}$ ),

49 because the stream for the inner outlet contained both sorted cells and cell-limited portion of the  
50 flow. The stream for the inner outlet at lower fluidic resistance ratios ( $R_{OO}/R_{IO} = 1.8$  and  $R_{OO}/R_{IO}$   
51  $= 1$ ) contained only the portion of the sorted cells possibly because of the reduced streamline  
52 boundary toward the inner wall of the channel. **(b)** The 2D spiral channel designs were  
53 constructed to theoretically validate the experimental results using COMSOL simulation. Four  
54 spiral channel designs with different fluidic resistance ratios at the outlets were tested using  
55 COMSOL software (COMSOL Multiphysics, Burlington, MA, USA). The average input flow  
56 velocity was 0.264 m/s. This value corresponds to 1 mL/min flow rate for the spiral channel (600  
57  $\mu\text{m}$  width, 80  $\mu\text{m}$  inner wall depth, 130  $\mu\text{m}$  outer wall depth, and eight loops). The flow velocity  
58 of the inner outlet decreased with decreasing the fluidic resistance ratio ( $R_{OO}/R_{IO}$ ). The 2D  
59 streamline plots were obtained to observe changes in the streamline boundary between the inner  
60 and outer outlet flows with varying the fluidic resistance ratio at the outlets. The streamline  
61 boundary moved toward the inner wall of the channel near the outlets with decreasing the fluidic  
62 resistance ratio ( $R_{OO}/R_{IO}$ ). The width of the inner outlet stream was measured. The channels 1  
63 and 4 measured 465 and 296  $\mu\text{m}$ , respectively. This simulation result showed that the cell  
64 retention of the device could be affected by the fluidic resistance ratio at the outlets. Higher  
65 resistance ratio ( $R_{OO}/R_{IO}$ ) resulted in higher cell retention through the inner outlet of the device  
66 by increasing the streamline boundary toward the outer wall to induce more focused cells to flow  
67 into the inner outlet of the device.

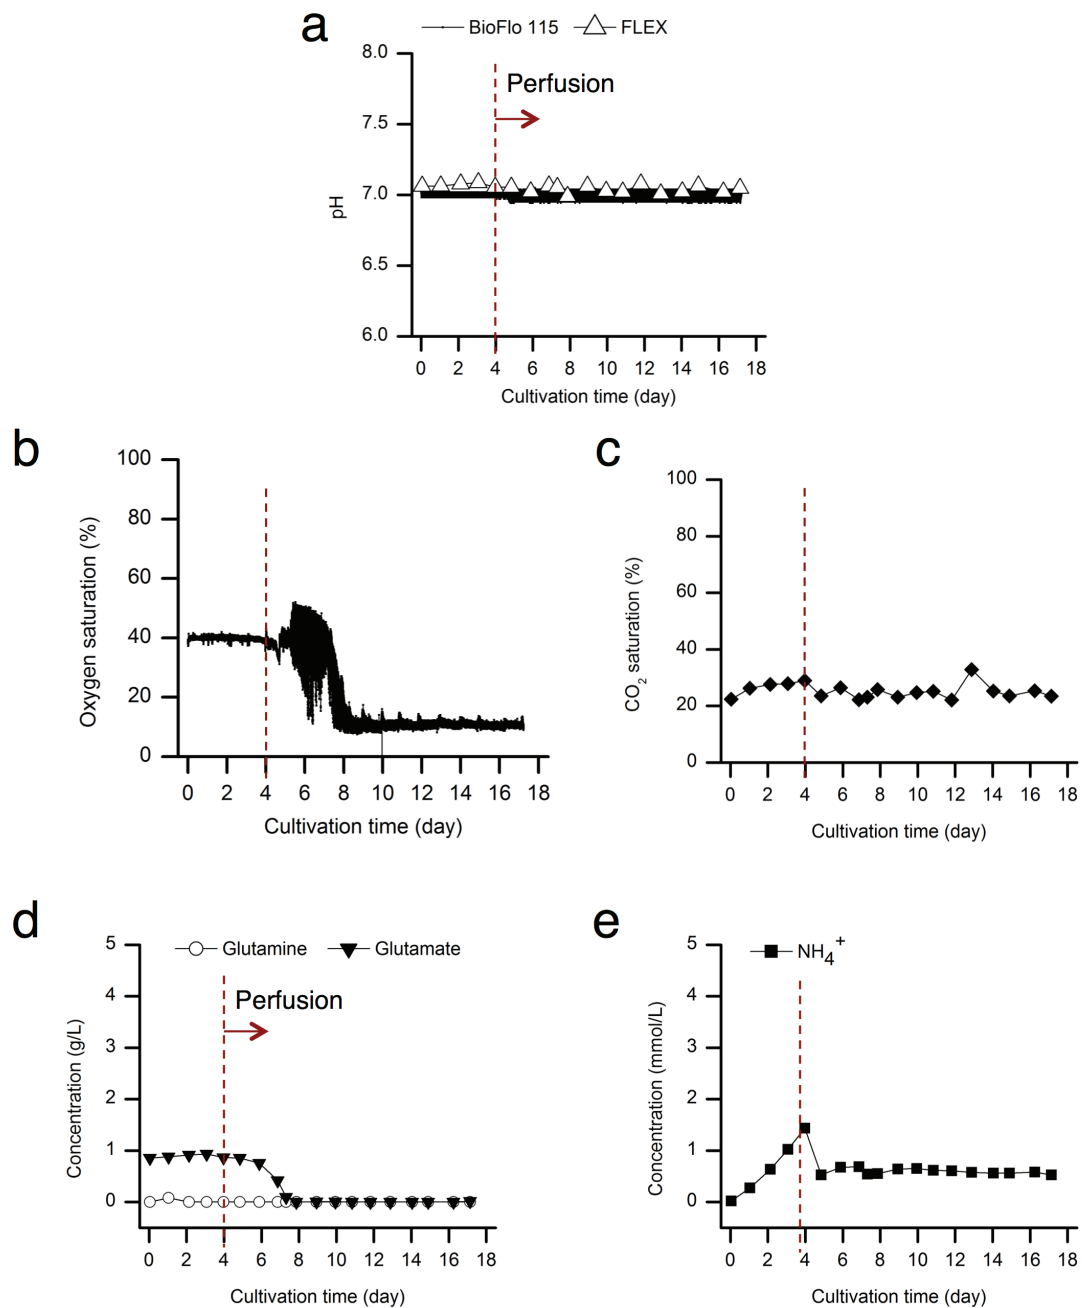

68  
 69 **Supplementary Figure S3** Other perfusion culture parameters. **(a)** pH values obtained from two  
 70 pieces of equipment (BioFlo/CelliGen 115 systems, New Brunswick Scientific, USA; Bioprofile  
 71 FLEX Analyzer, Nova Biomedical, USA). **(b)** Dissolved oxygen level. **(c)** Dissolved carbon  
 72 dioxide level. **(d)** Glutamine and glutamate concentrations. **(e)** Ammonium concentration.

73  
74  
75  
76  
77  
78  
79  
80  
81  
82  
83  
84  
85  
86  
87  
88  
89  
90  
91  
92  
93  
94  
95  
96  
97

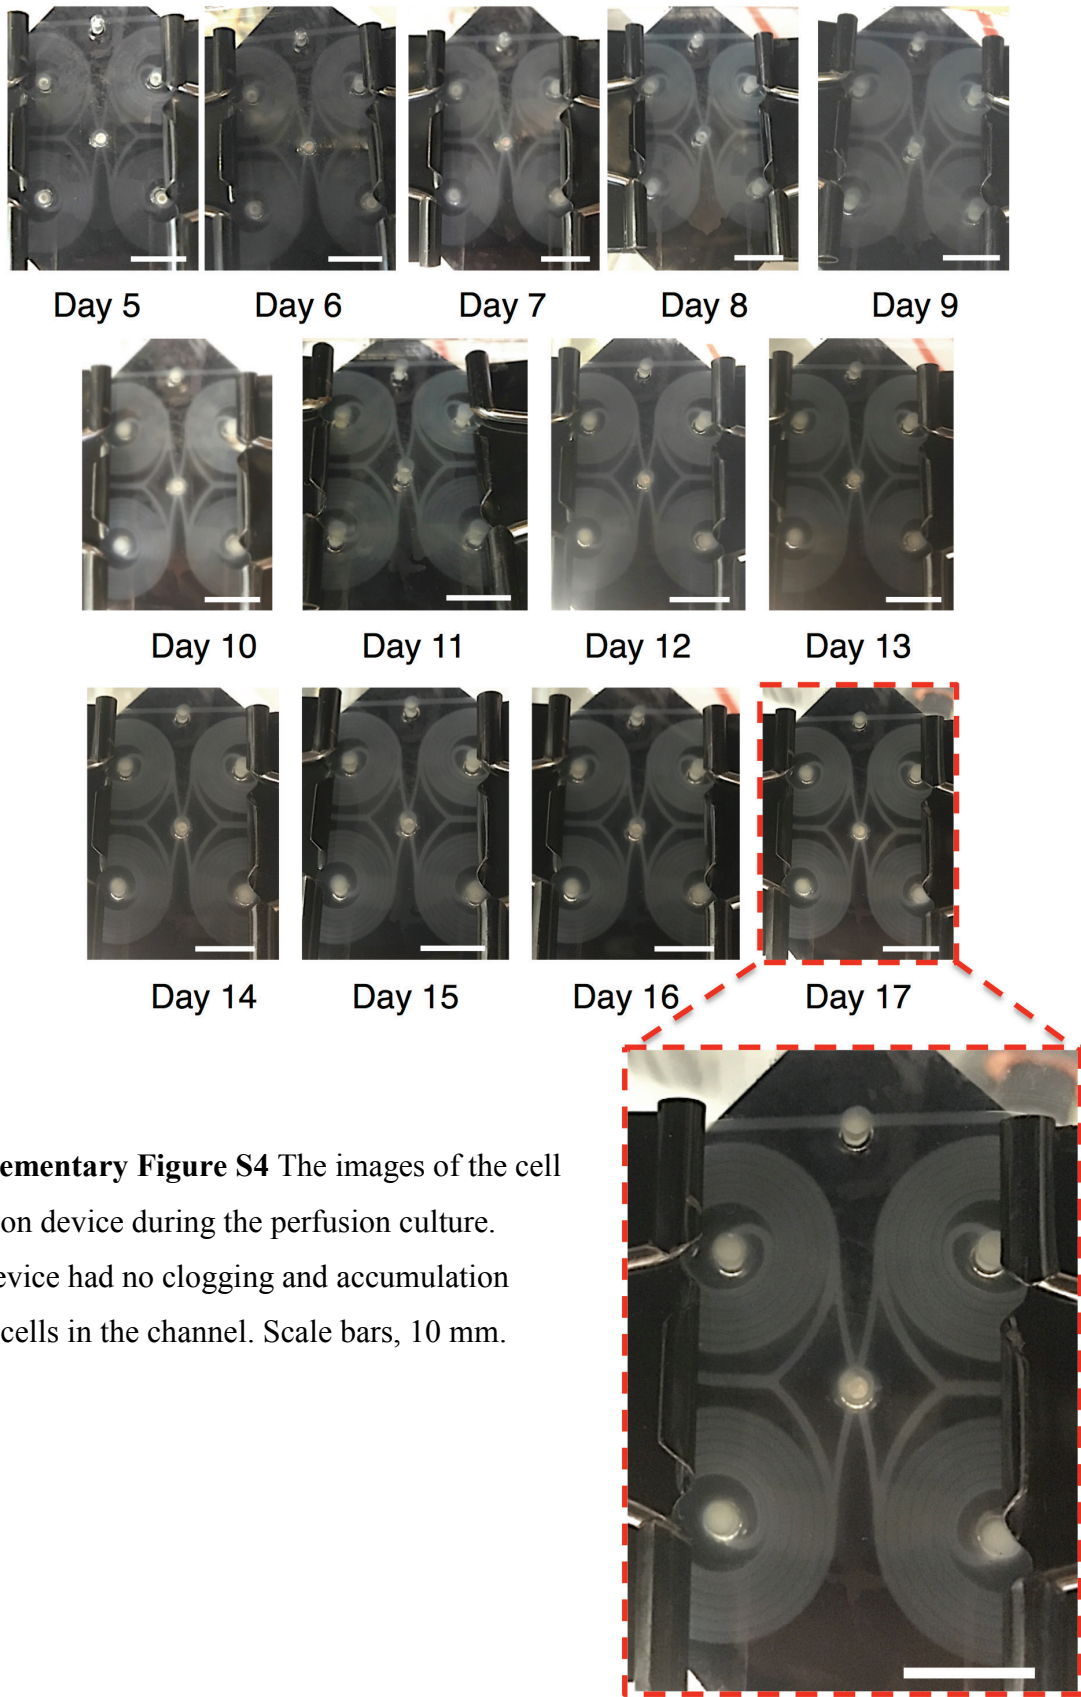

**Supplementary Figure S4** The images of the cell retention device during the perfusion culture. The device had no clogging and accumulation of the cells in the channel. Scale bars, 10 mm.



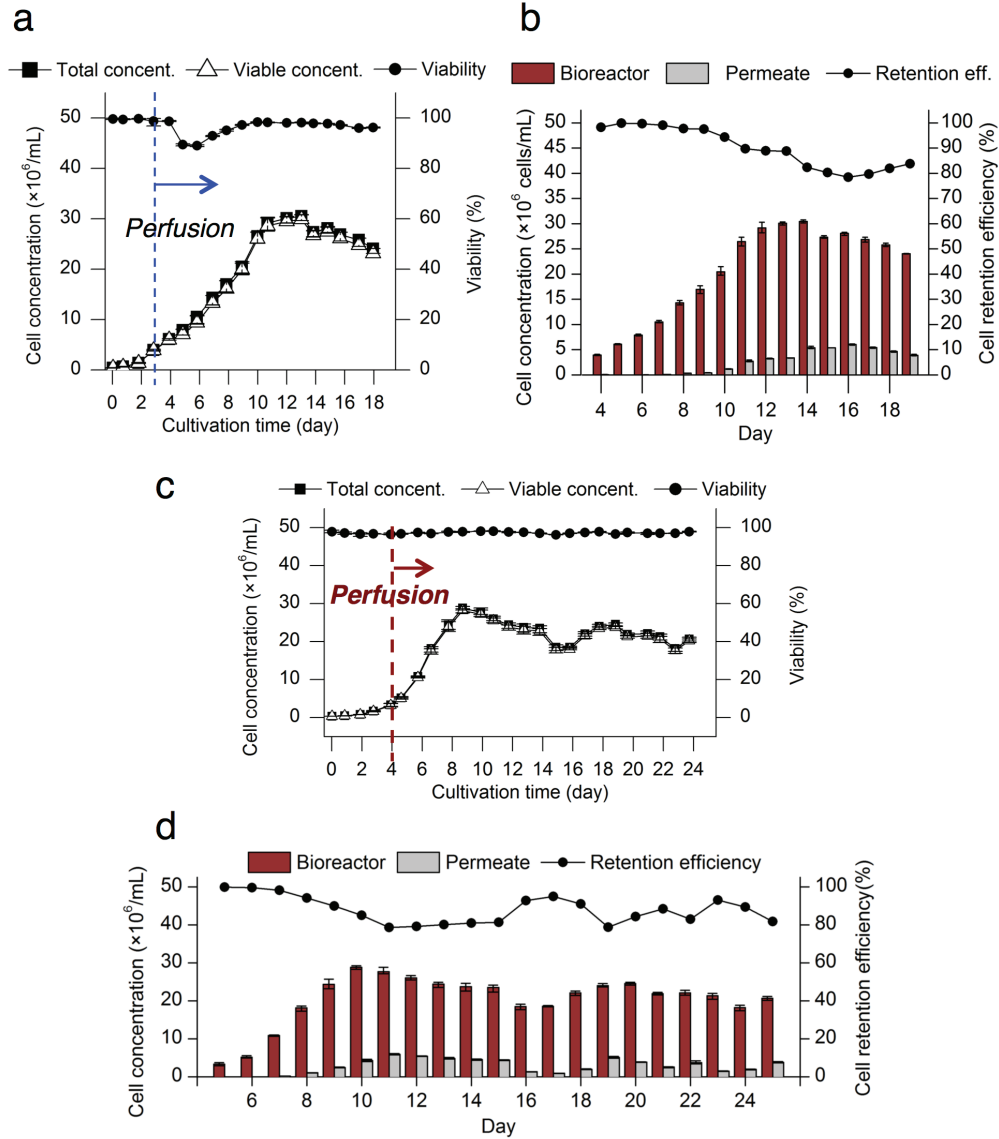

98

99 **Supplementary Figure S5** The second and third perfusion culture results. Error bars, data range

100 ( $n = 3$ , technical replicates). **(a)** The decreased viability was observed around Day 5 because of

101 operation failure of the magnetic stirrer. The CHO cells were recovered, and high viability

102 ( $>97\%$ ) was maintained throughout the culture. The maximum cell concentration was

103 approximately 30.5 million cells/mL on Day 13. **(b)** The cell retention efficiency of the device

104 was measured at  $>80\%$  under the concentration of 20–30 million cells/mL throughout the

105 perfusion culture. **(c)** The peak cell concentration was 28.8 million cells/L, and the average

106 viability during perfusion was 97%. **(d)** The average cell concentrations in the bioreactor and in

107 the permeate after Day 12 were 21.8 and 3.1 million cells/mL, respectively. The average cell

108 retention efficiency after Day 12 was 86%.

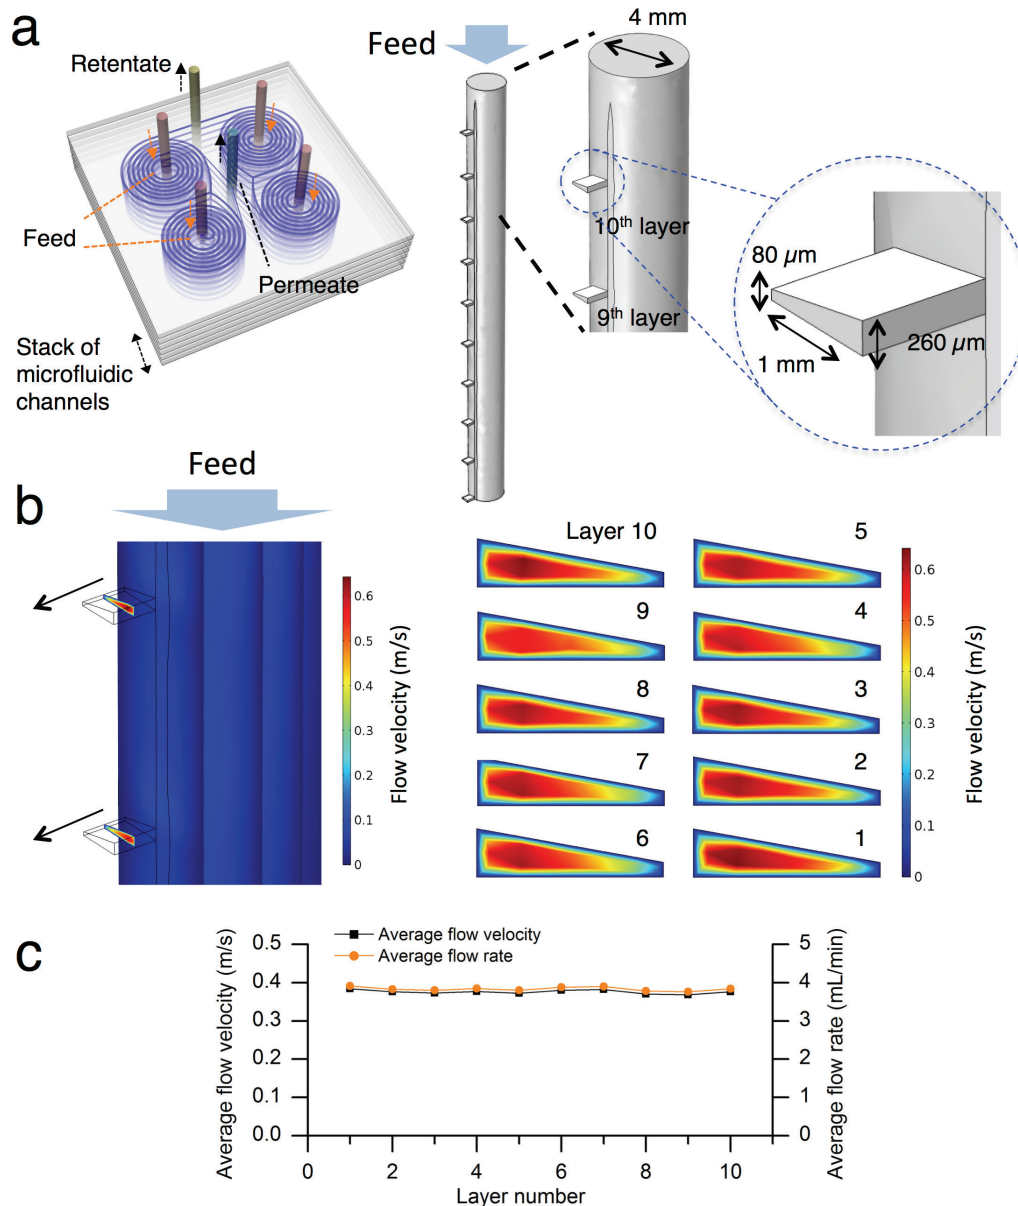

109

110 **Supplementary Figure S6** Flow distribution in the stacked microfluidic cell retention device.

111 **(a)** One of the feed streams of 10-layer stacked device containing four spiral channels in one  
 112 layer was simulated using COMSOL software (COMSOL Multiphysics, Burlington, MA, USA).

113 The fluidic paths of common feed stream of 4mm in diameter and inlet streams of 10 spiral  
 114 channels were modeled. **(b)** The feed velocity of 51.6 mm/s corresponding to 38.9 mL/min flow  
 115 rate (56 L/day) was simulated, and flow velocity magnitude of each input layer was plotted.

116 The surface average of flow velocity magnitude of each input layer was evaluated and converted  
 117 to the average flow rate. The average flow rate of each layer had the average of 3.83 mL/min and  
 118 standard deviation of 0.05 mL/min.



119

120 **Supplementary Table S2** Summary of the batch and perfusion cultures.

| Parameter                                                                                           | Batch #1 | Batch #2 | Perfusion #1 |
|-----------------------------------------------------------------------------------------------------|----------|----------|--------------|
| Cultivation time (h)                                                                                | 264      | 264      | 390          |
| Perfusion time (h)                                                                                  | N/A      | N/A      | 294          |
| Working volume (mL)                                                                                 | 250      | 250      | 350          |
| Spent medium (mL)                                                                                   | 250      | 250      | 8510         |
| Maximum viable cell concentration<br>( $\times 10^6$ cells/mL)                                      | 4.8      | 5.7      | 22.7         |
| Maximum total cell concentration<br>( $\times 10^6$ cells/mL)                                       | 5.5      | 6.1      | 23.0         |
| Average specific growth rate during<br>exponential growth phase ( $\text{h}^{-1}$ ) <sup>†</sup>    | 0.03     | 0.03     | 0.03         |
| Total amount of product harvested (mg)                                                              | 8.2      | 8.9      | 262.6        |
| IgG1 titer ( $\text{mg} \cdot \text{spent medium L}^{-1}$ )                                         | 32.8     | 35.6     | 30.9         |
| Integral cell area<br>( $\times 10^6$ cells $\cdot$ mL <sup>-1</sup> $\cdot$ day) <sup>§</sup>      | 33.9     | 37.5     | 228.4        |
| Specific productivity ( $\text{pg} \cdot \text{cell}^{-1} \cdot \text{day}^{-1}$ ) <sup>*</sup>     | 1.0      | 0.9      | 3.3          |
| Bioreactor productivity<br>( $\text{mg} \cdot \text{working volume L}^{-1} \cdot \text{day}^{-1}$ ) | 3.0      | 3.2      | 46.9         |

121

122 <sup>†</sup>The specific cell growth rate during exponential growth phase was calculated as follows:  $\mu =$ 123  $\frac{\ln(X_2) - \ln(X_1)}{t_2 - t_1}$ , where  $\mu$ , X, and t represent the growth rate, the viable cell concentration, the time at

124 which the sample was taken, respectively.

125 <sup>§</sup>Area under the curve for cell growth that accounts for the titer126 <sup>\*</sup>Titer/(Integral cell area) for the batch cultures, (Titer  $\times$  spent medium volume)/(Integral cell127 area  $\times$  working volume) for the perfusion culture

128 **Supplementary Table S3** Comparison with other cell retention technologies commercially  
 129 available for perfusion cultures of suspended mammalian cells (CHO cells)

|                                                      | <b>Tangential<br/>Flow Filtration<br/>(TFF)</b> | <b>Alternating<br/>Tangential<br/>Flow System<br/>(ATF)</b> | <b>Inertial<br/>sorting</b> | <b>Centrifugation</b>                                                       | <b>Acoustic wave</b>                                                           | <b>Inclined<br/>sedimentation</b> |
|------------------------------------------------------|-------------------------------------------------|-------------------------------------------------------------|-----------------------------|-----------------------------------------------------------------------------|--------------------------------------------------------------------------------|-----------------------------------|
| Company /<br>Institution                             | GE Healthcare,<br>Spectrum Labs                 | Repligen                                                    | MIT                         | Pneumatic Scale<br>Angelus <sup>a</sup> ,<br>Sartorius <sup>b</sup>         | Applikon<br>Biotechnology <sup>a</sup> ,<br>APICells <sup>b</sup>              | Roche<br>Diagnostics<br>GmbH      |
| Maximum cell<br>density ( $\times 10^6$<br>cells/mL) | 214 <sup>1</sup>                                | 132 <sup>1</sup>                                            | 44 <sup>*</sup>             | 35 <sup>a, 2</sup><br>15 <sup>b, 3</sup>                                    | 20 <sup>a, 4</sup>                                                             | 16 <sup>5</sup>                   |
| Cell retention<br>efficiency (%)                     | 100                                             | 100                                                         | 84 <sup>*</sup> to 99       | Rapid decrease<br>observed<br>at $>40 \times 10^6$<br>cells/mL <sup>2</sup> | Rapid decrease<br>observed<br>at $>20 \times 10^6$<br>cells/mL <sup>a, 4</sup> | 85 to 99 <sup>5</sup>             |
| Scalability<br>(L/day)                               | 2 to 2000 <sup>6</sup>                          | <1 to >2000 <sup>6</sup>                                    | <1 to<br>>500               | Up to 3000 <sup>a, 6</sup><br>100 to 6000 <sup>b, 6</sup>                   | <1 to 1000 <sup>a, †</sup><br>1 to 20 <sup>b, §</sup>                          | Up to 3000 <sup>5</sup>           |
| Product<br>recovery                                  | Low                                             | Medium                                                      | High                        | High                                                                        | High                                                                           | High                              |
| Dead cell<br>removal                                 | No                                              | No                                                          | Yes                         | Yes                                                                         | Yes                                                                            | Yes                               |
| Capital and<br>operation cost                        | High                                            | High                                                        | Low                         | High                                                                        | Medium                                                                         | Low                               |

130

131 <sup>\*</sup> Obtained from the *in vitro* device characterization experiment (**Fig. 2d**)

132 <sup>†</sup> Retrieved November 29, 2016 from <http://www.applikonbio.com/en/products/bioseper-perfusion>

133 <sup>§</sup> Retrieved November 29, 2016 from <http://www.apicells.com/news/105-the-cytoperf->

134 [technology-at-the-esact](http://www.apicells.com/news/105-the-cytoperf-technology-at-the-esact)

135

136 **REFERENCES**

- 137 1. Clincke, M. F. *et al.* Very high density of CHO cells in perfusion by ATF or TFF in  
138 WAVE bioreactor<sup>TM</sup>: Part I: Effect of the cell density on the process. *Biotechnol. Prog.*  
139 **29**, 754–767 (2013).
- 140 2. Kim, S. C. *et al.* Effect of transmembrane pressure on Factor VIII yield in ATF perfusion  
141 culture for the production of recombinant human Factor VIII co-expressed with von  
142 Willebrand factor. *Cytotechnology* **68**, 1687–1696 (2016).
- 143 3. Mehta, S. in *Continuous Processing in Pharmaceutical Manufacturing* (ed. Subramanian,  
144 G.) 385–400 (2014). doi:10.1002/9783527673681.ch15
- 145 4. Duvar, S., Hecht, V., Finger, J., Gullans, M. & Ziehr, H. Developing an upstream process  
146 for a monoclonal antibody including medium optimization. *BMC Proc.* **7**, P34 (2013).
- 147 5. Pohlscheidt, M. *et al.* Optimizing capacity utilization by large scale 3000 L perfusion in  
148 seed train bioreactors. *Biotechnol. Prog.* **29**, 222–229 (2013).
- 149 6. Whitford, W. G. in *Continuous Processing in Pharmaceutical Manufacturing* (ed.  
150 Subramanian, G.) 183–226 (2014). doi:10.1002/9783527673681.ch09

151
